**Title: A comparison of regression discontinuity and propensity score matching to estimate the causal effects of statins using electronic health records**

**Authors:** Michelle C. Odden, PhD<sup>1</sup>, Adina Zhang, MS<sup>2</sup>, Neal Jawadekar, MPH<sup>2</sup>, Annabel Tan, MPH<sup>1</sup>, Adina Zeki Al Hazzouri, PhD<sup>2</sup>, Sebastian Calonico, PhD<sup>3</sup>

**Author's affiliations:**

1. Department of Epidemiology and Population Health, Stanford University, Stanford, CA
2. Department of Epidemiology, Columbia University, New York, NY
3. Department of Health Policy and Management, Columbia University, New York, NY

**Disclaimer:** The authors have withdrawn this manuscript because the results are currently in the process of being updated. Therefore, the authors do not wish this work to be cited as reference for the project. If you have any questions, please contact the corresponding author.
